# Supplementary material for: TOP1α, UPF1, and TTG2 regulate seed size in a parental dosage–dependent manner
Source: PubMed Central journal article supplement (PMC7673560; doi:10.1371/journal.pbio.3000930), 2020-11-06
Supplement: pbio.3000930.s009.pdf [file pbio.3000930.s009.pdf]

**S1 Table. Summary of the parent-of-origin genotypes and the corresponding parental *TTG2* dosages.**

| Cross combinations <sup>a</sup>   | <i>TTG2</i> level in         |                    | Relative <i>TTG2</i> <sup>d</sup> | Seed phenotype |
|-----------------------------------|------------------------------|--------------------|-----------------------------------|----------------|
|                                   | Antipodal cells <sup>b</sup> | Sperm <sup>c</sup> |                                   |                |
| WT x WT                           | /                            | /                  | balance                           | Normal         |
| WT x <i>top1α-10</i>              | /                            | ↑                  | A<S                               | Small          |
| <i>top1α-10</i> x WT              | ↑↑↑                          | /                  | A>S                               | Large          |
| <i>top1α-10</i> x <i>top1α-10</i> | ↑↑↑                          | ↑                  | A>S                               | Large          |
| WT x <i>ttg2-6</i>                | /                            | ↓                  | A>S                               | Large          |
| <i>ttg2-6</i> x WT                | ↓↓↓                          | /                  | A<S                               | Small          |
| <i>ttg2-6</i> x <i>ttg2-6</i>     | ↓↓↓                          | ↓                  | A<S                               | Small          |

<sup>a</sup>: Since *UPF1* acts similarly as *TOP1α*, only the phenotypes of *TOP1α* and *TTG2* are listed.

<sup>b</sup>: Maternal *TTG2* is contributed by three antipodal cells, and its upregulation, downregulation and unchanged status are indicated as “↑↑↑”, “↓↓↓” and “/”, respectively.

<sup>c</sup>: Paternal *TTG2* is contributed by the sperm cell, and its upregulation, downregulation and unchanged status are indicated as “↑”, “↓” and “/”, respectively.

<sup>d</sup>: “A” indicates relative *TTG2* level in antipodal cells, while “S” indicates relative *TTG2* level in sperms.
