# Supplementary material for: TOP1α, UPF1, and TTG2 regulate seed size in a parental dosage–dependent manner
Source: PubMed Central journal article supplement (PMC7673560; doi:10.1371/journal.pbio.3000930), 2020-11-06
Supplement: pbio.3000930.s010.pdf [file pbio.3000930.s010.pdf]

## S2 Table. Primers used in this study.

### 1. Primers for UPF1, TOP1 and TTG2 cloning

#### nYFP fusion

---

|            |                                          |
|------------|------------------------------------------|
| 106-UPF1-F | NCGGGATCCATGGATTCTCAACAGAGCGATCTCTTTG    |
| 106-UPF1-R | NCCTGTCGACTCAGCCATTGTAAGGATGTTTTGGGTTTTG |

#### cYFP fusion

---

|            |                                |
|------------|--------------------------------|
| 104-TOP1-F | CATGGTACCATGGGCACTGAAACAGTTTC  |
| 104-TOP1-R | GCATCTAGAACGGCGCGAGAATCTGTACTC |

#### mCherry fusion

---

|           |                                       |
|-----------|---------------------------------------|
| UPF1-mc-F | NCGGGATCCATGGATTCTCAACAGAGCGATCTCTTTG |
| UPF1-mc-R | NCCTGTCGACGCCATTGTAAGGATGTTTTGGGTTTTG |

#### GFP fusion

---

|            |                                |
|------------|--------------------------------|
| TOP1-GFP-F | CATGGTACCATGGGCACTGAAACAGTTTC  |
| TOP1-GFP-R | GCATCTAGAACGGCGCGAGAATCTGTACTC |

#### BD fusion

---

|              |                                              |
|--------------|----------------------------------------------|
| BD-UPF1-F    | ATTGGCCATGGAGGCCATGGATTCTCAACAGAGCGATCTCTTTG |
| BD-UPF1-R    | TCCCCCGGGTCAGCCATTGTAAGGATGTTTTGGGTTTTG      |
| BD-UPF1-P1-R | TCCCCCGGGTGGGAAGACGAAGTATGCA                 |
| BD-UPF1-P2-F | ATTGGCCATGGAGGCCAAGGAGGAAAATGAATTGCG         |
| BD-UPF1-P2-R | TCCCCCGGGTCCAATCATGCCAGCTCCACCAC             |
| BD-UPF1-P3-F | ATTGGCCATGGAGGCCAATGATAATTTTGGTTCGGGTAAC     |

#### UPF1 genomic fragment

---

|            |                                             |
|------------|---------------------------------------------|
| gUPF1-5'-F | GCTATGACCATGATTACGTGGTTGTTTTTCGTTTATTCTTTTC |
| gUPF1-5'-R | ATCCAAGGGCGAATTGGTCGCCATTGTAAGGATGTTTTGGGT  |
| UPF1-3EX-F | ATGACAAATGATCCACTGGGTGAGAAAGACAAAACCTGG     |
| UPF1-3EX-R | TACGAACGAAAGCTCGAACTAATATGAGTTTAACACGACCTCC |

#### Add NLS

---

|           |                                                                                          |
|-----------|------------------------------------------------------------------------------------------|
| add-nls-F | AATTGTTGTTGGTAGGGTCAGGCGGAGGAGGTCCGAAAAAGAAGAAACGAA<br>AGGTTGAAGATTGTCCCGCCGGATATAAGA    |
| add-nls-R | AAATCCACCCGGTGAGGGGTCCGGTTCGGCGACCGGAGCACTCGTCAACCA<br>TTTTCCGCTTCTTATATCCGGCGGGACAATCTT |

#### UPF1 promoter

---

|                     |                                             |
|---------------------|---------------------------------------------|
| ProUPF1-5'-F        | GCTATGACCATGATTACGTGGTTGTTTTTCGTTTATTCTTTTC |
| ProUPF1-5'-R        | TGATCCAAGGGCGAATTGTAGAAAAATCAGGGGAGAAA      |
| GUS-for-5'ProUPF1-F | TTGGATCAGAATTTGCCATGTTACGTCCTGTAGAAACCCCA   |
| GUS-for-5'ProUPF1-R | TCGTCCTTGTAGTCCATGGTTGTTTGCCCTCCCTGCTGCGG   |

|            |                                             |
|------------|---------------------------------------------|
| UPF1-3EX-F | ATGACAAATGATCCACTGGGTGAGAAAGACAAAACCTTGG    |
| UPF1-3EX-R | TACGAACGAAAGCTCGAACTAATATGAGTTTAACACGACCTCC |

### TOP1 promoter

|           |                                                    |
|-----------|----------------------------------------------------|
| ProTOP1-F | GCTATGACCATGATTACGCCAAGCTTTAGTGACTTATGGTATTCGCTTTG |
| ProTOP1-R | CGGGGATCCTCTAGAGTCGACTTCCCGAAAGAACAACG             |

### TTG2 promoter

|           |                                           |
|-----------|-------------------------------------------|
| ProTTG2-F | TGACCATGATTACGCCTTCAGTGGGTGTTTTTGGGATGT   |
| ProTTG2-R | CCGGGGATCCTCTAGACCATTCCAATACCTTTTACTTCAGC |

### Primers for *in situ* probes

|               |                            |
|---------------|----------------------------|
| Probe-top1a-F | TTCCTCCAACAGTAACACATCATCTG |
| Probe-top1a-R | ACGTGGAATATTTTGAGTCCTTCGT  |
| Probe-UPF1-F  | TCTCTTTGACACCCGCATCGCAG    |
| Probe-UPF1-R  | GTCCCACTTTCGCACCATTCCC     |

## 2. Primers for ChIP, DRIP, FAIRE and DNA methylation analysis

### For ChIP, DRIP, FAIRE and mCIP

|             |                                |
|-------------|--------------------------------|
| C-TTG2-1-F  | CGATTTTCTCATACCGTTGGTT         |
| C-TTG2-1-R  | CGTGGCATGTGACTTTTTTCTCT        |
| C-TTG2-2-F  | GTTGGAAAAGGAACTTACGCTA         |
| C-TTG2-2-R  | TGAGAGAGAGGTCCAGAAGATG         |
| C-TTG2-3-F  | TGAGCTAAGTCCATTTGAAAGTG        |
| C-TTG2-3-R  | GATAGCTGCATCAAGTAACAAGAG       |
| C-TTG2-4-F  | AATGTGGCAAGGGTTTTAATGTA        |
| C-TTG2-4-R  | GATGTGGAGGGAGAAAGTGGAT         |
| C-TTG2-5-F  | CTTGACGATTACGAGGAGAAAC         |
| C-TTG2-5-R  | AACACAAAATTGATTACGCATATG       |
| C-TTG2-6-F  | GTATCAATACTTCTACACCACTTGTTATGC |
| C-TTG2-6-R  | AGCCGCAATATCATCATTCATCA        |
| C-TTG2-7-F  | CAGTAAAGTAAAACAGCCGCA          |
| C-TTG2-7-R  | TCCATGATGTAAGGAACGATT          |
| C-TTG2-8-F  | GTCTCTGAATTTTTTTTTGGTTTT       |
| C-TTG2-8-R  | TGTCACTGTGATTTAGATTGCTATG      |
| C-TTG2-9-F  | GTAGAGAGGAGAGTTGATAAGAAAAG     |
| C-TTG2-9-R  | GTTGAAGCTTAATCAATGTATATAAAC    |
| C-TTG2-10-F | TAGTGAAAAGTATTGGACAAGATGAC     |
| C-TTG2-10-R | GGTTTATTTTCGGTTACACCTCTGT      |
| C-TTG2-11-F | ATAAGTTCTTTTGGTCGCTGTAGT       |
| C-TTG2-11-R | GTTGAAGTTGAAAGTTAGTTGGAA       |
| C-TTG2-12-F | CGTGTATCCATCACAGTGTCGGC        |
| C-TTG2-12-R | CACGACGGTGAATGCAAAAAC          |

|             |                             |
|-------------|-----------------------------|
| C-TTG2-13-F | ATTTTGCTCCATCTTTCCTTTTCCT   |
| C-TTG2-13-R | CACCATCATTCACCTCCATTACTT    |
| C-TTG2-14-F | TACCGTATCTCCGCAAACGACTT     |
| C-TTG2-14-R | CTGCTACTGGCTGATTGAATCTCA    |
| C-TTG2-15-F | TCAACTATTTCTGATAATGATAGGCTG |
| C-TTG2-15-R | TAGGATACTGCTTCGCTTTTGTCTC   |
| C-TTG2-16-F | ATCAGTGGAAGGTCAAGTTTCAGAG   |
| C-TTG2-16-R | CCTTCACTCATCTTCTCTGTCTGTTT  |
| C-TTG2-17-F | AGTGCTAATTGCAGAGCAAGGAAA    |
| C-TTG2-17-R | GGAAGAGTAGAGGAAGATGGAGGG    |
| C-TTG2-18-F | AGTAACCACGTTGGTATTGTACTAC   |
| C-TTG2-18-R | GATCTTGACATGTGATTCTTTCTC    |
| C-TTG2-19-F | TTAGCAACTCTCTCAATCTCATCT    |
| C-TTG2-19-R | TAATAATAGCATCTTCTCTTGTCTTG  |
| C-TTG2-20-F | TCCTGACAGCCATCAACTTCTT      |
| C-TTG2-20-R | CGCAACTTTTGTTCCTCCATACT     |

**For 3C**

---

|                   |                                  |
|-------------------|----------------------------------|
| 3C-TTG2-CviQI-P1  | TCTGGAAGCAACAATGGCGAT            |
| 3C-TTG2-CviQI-P2  | CACTGTTAGAAATGATAATGGAGATTG      |
| 3C-TTG2-CviQI-P3  | GGATGCCTCCAGGTAAGTCAA            |
| 3C-TTG2-CviQI-P4  | AGCGTCAAAAACCAACAACAT            |
| 3C-TTG2-CviQI-P5  | AATTGTCTAACTAATATGTTAGGTTAGTTAAG |
| 3C-TTG2-CviQI-P6  | AAGACTACAGCGACCAAAAGAACT         |
| 3C-TTG2-CviQI-P7  | AGATGGAGCAAAATCAAAGAAGA          |
| 3C-TTG2-CviQI-P8  | CCAGTAGATGTCTCTGATTCCG           |
| 3C-TTG2-CviQI-P9  | CGAAAATGTAAACAAGTATCGGATAG       |
| 3C-TTG2-CviQI-P10 | TCTAAGGACACAACCAATGCC            |
| 3C-TTG2-TaqI-P1   | CGAAAGTGAGATTTGACCGAA            |
| 3C-TTG2-TaqI-P2   | TTTTCTTTCCCATTTTCTGTTACT         |
| 3C-TTG2-TaqI-P3   | CAGTGGATTGTCTTTTGGTTCAG          |
| 3C-TTG2-TaqI-P4   | GAAATGCTGAACGGGACTTGG            |
| 3C-TTG2-TaqI-P5   | GGTGTAACCGAAATAAACCGAAT          |
| 3C-TTG2-TaqI-P6   | ACGACTTGCCACGAGATTGTAG           |
| 3C-TTG2-TaqI-P7   | TGTCTCCAAAGCAACCGTCTC            |
| 3C-TTG2-TaqI-P8   | ACTCAAAGCCATCTTGTCTCT            |
| 3C-TTG2-TaqI-P9   | TATTTTTTAGGGGTAACCTTTCTTCAA      |
| 3C-TTG2-TaqI-P10  | ATATAACTACCATGATTTATAGCACTTAA    |
| 3C-TTG2-TaqI-P11  | CACAGAGTATCGTCCAGCAGTAT          |

**For methylation map**

---

|      |                         |
|------|-------------------------|
| m1-F | CGAAAGTGAGATTTGACCGAA   |
| m1-R | TCTGGAAGCAACAATGGCGAT   |
| m2-F | CGATTTTCTCATAACCGTTGGTT |

|       |                                |
|-------|--------------------------------|
| m2-R  | TGAGAGAGAGGTCCAGAAGATG         |
| m3-F  | GTTGGAAAAGGAACTTACGCTA         |
| m3-R  | TGAGAGAGAGGTCCAGAAGATG         |
| m4-F  | CTTGACGATTACGAGGAGAAAC         |
| m4-R  | AACACAAAATTGATTACGCATATG       |
| m5-F  | CTTGACGATTACGAGGAGAAAC         |
| m5-R  | AGCCGCAATATCATCATTCATCA        |
| m6-F  | TTCACCTCAATAGAAATAATCATAACACAC |
| m6-R  | AGCCGCAATATCATCATTCATCA        |
| m7-F  | TACTTGCTCTGTTATTTGTTGTGAT      |
| m7-R  | AGCGTCAAAAACCAACAACAT          |
| m8-F  | GAAATGCTGAACGGGACTTGG          |
| m8-R  | GTTGAAGCTTAATCAATGTATATAAAC    |
| m9-F  | TAGTGAAAAGTATTGGACAAGATGAC     |
| m9-R  | AAGACTACAGCGACCAAAAAGAACT      |
| m10-F | GGTGTAACCGAAATAAACCGAAT        |
| m10-R | AAGACTACAGCGACCAAAAAGAACT      |
| m11-F | GGTGTAACCGAAATAAACCGAAT        |
| m11-R | AAGACTACAGCGACCAAAAAGAACT      |
| m12-F | ATAAGTTCTTTTGGTCGCTGTAGT       |
| m12-R | GTTGAAGTTGAAAGTTAGTTGGAA       |
| m13-F | ATAAGTTCTTTTGGTCGCTGTAGT       |
| m13-R | CACGACGGTGAATGCAAAAACCT        |
| m14-F | CGTGTATCCATCACAGTGTCGGC        |
| m14-R | CACGACGGTGAATGCAAAAACCT        |
| m15-F | TCAACTATTTCTGATAATGATAGGCTG    |
| m15-R | TAGGATACTGCTTCGCTTTGTCTC       |
| m16-F | ATGGATACAACCTGGAGGAAATACGG     |
| m16-R | CCTTCACTCATCTTCTCTGTTCTGTTT    |
| m17-F | TTATTACACCATTTGAGTTTGCTG       |
| m17-R | CTTCTCGTTCTTCCTGTTATCAAA       |
| m18-F | CAATCACCATTTGCTCTTCACTC        |
| m18-R | GAAGAAAGTTACCCCTAAAAAATA       |
| m19-F | TATTTTTTAGGGGTAACCTTCTTCAA     |
| m19-R | TTGAGTTACACCGATGGAAATTG        |
| m20-F | AGTAACCACGTTGGTATTGTACTAC      |
| m20-R | GATCTTGACATGTGATTCTTTCTC       |
| m21-F | AGTAACCACGTTGGTATTGTACTAC      |
| m21-R | GATCTTGACATGTGATTCTTTCTC       |
| m22-F | TTAGCAACTCTCTCAATCTCATCT       |
| m22-R | CACAGAGTATCGTCCAGCAGTAT        |
| m23-F | TCCTGACAGCCATCAACTTCTT         |
| m23-R | CGCAACTTTTGTTCCCCATACT         |

---

### 3. Primers for qRT-PCR

---

|             |                          |
|-------------|--------------------------|
| qRT-TTG2-F  | AGTGCTAATTGCAGAGCAAGG    |
| qRT-TTG2-R  | GAAGAGTAGAGGAAGATGGAGGG  |
| qRT-UPF1-F  | ATCCCAGGATGATGGACAGCAG   |
| qRT-UPF1-R  | CGAATTTGGGAGACCCTGAGAC   |
| qRT-U-BOX-F | TCTTCTTCTGCTACATCTACTCTC |
| qRT-U-BOX-R | AGTGTGTGAACCCGTGAAC      |
| qRT-PP2A-F  | TTGGTGCTCAGATGAGGGAGAG   |
| qRT-PP2A-R  | TTCACCAGCTGAAAGTCGCTTAG  |
| qRT-GAPDH-F | ACCACTGTCCACTCTATCACTGC  |
| qRT-GAPDH-R | TGAGGGATGGCAACACTTTCCC   |
| qRT-ACT2-F  | TCTTCCGCTCTTTCTTTCCAAGC  |
| qRT-ACT2-R  | ACCATTGTCACACACGATTGGTTG |
| qRT-UBC10-F | CCATCCCAACATTAACAGCAACGG |
| qRT-UBC10-R | ACAGATCGATAGCAGCACCTTGG  |
| qRT-TUB2-F  | TAACAACCTGGGCCAAGGGACAC  |
| qRT-TUB2-R  | ACAAACCTGGAACCCTTGGAGAC  |
| qRT-UBQ10-F | TAAGACGTTGACTGGGAAAATA   |
| qRT-UBQ10-R | AGTTCTCCATCTTCAAGTTGC    |

---
