# Supplementary material for: TOP1α, UPF1, and TTG2 regulate seed size in a parental dosage–dependent manner
Source: PubMed Central journal article supplement (PMC7673560; doi:10.1371/journal.pbio.3000930), 2020-11-06

Fig. 1C

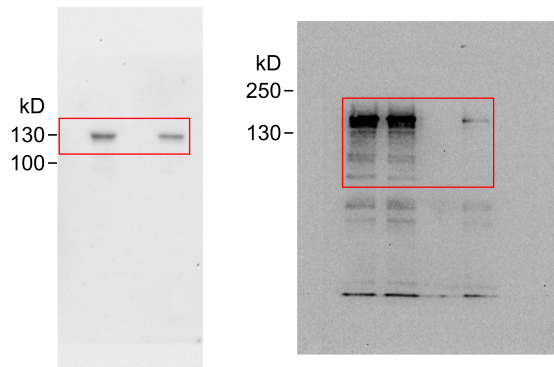

S1J Fig

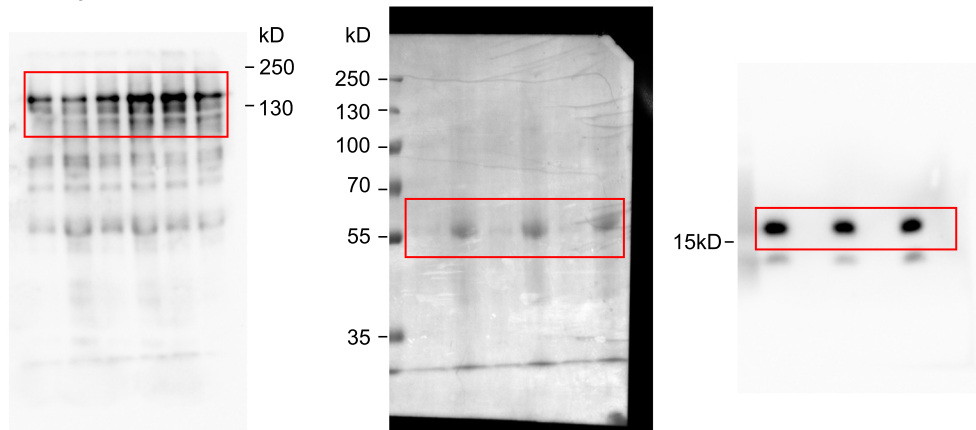

S1K Fig

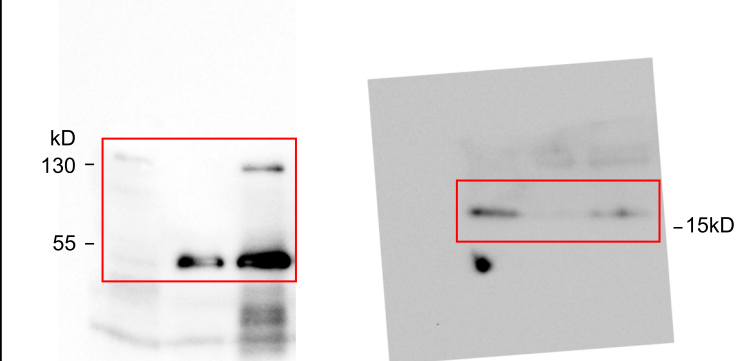

S1L Fig

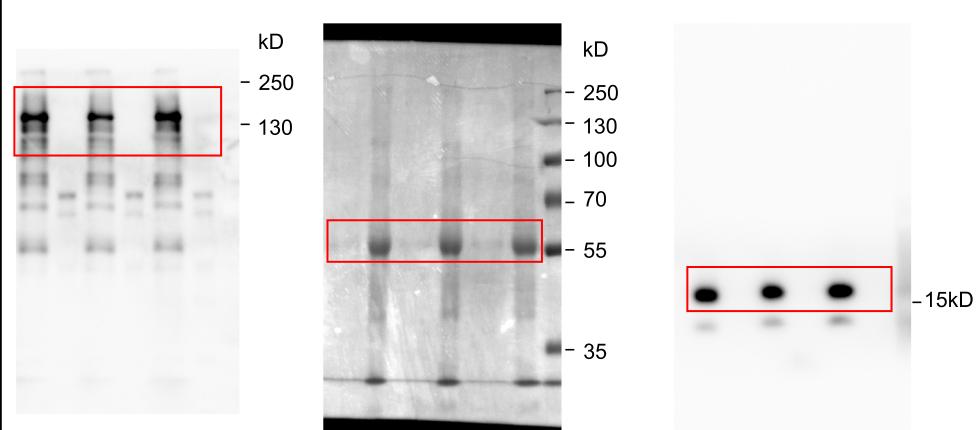

Supplement: pbio.3000930.s013.pdf [file pbio.3000930.s013.pdf]
